# Supplementary material for: Prediction of non-alcoholic fatty-liver disease and liver fat content by serum molecular lipids
Source: PubMed Central journal article supplement — Diabetologia. 2013 Jul 4;56(10):2266–74. doi: 10.1007/s00125-013-2981-2 (PMC3764317; doi:10.1007/s00125-013-2981-2), 2013-07-04
Supplement: 125_2013_2981_MOESM4_ESM.pdf [file 125_2013_2981_MOESM4_ESM.pdf]

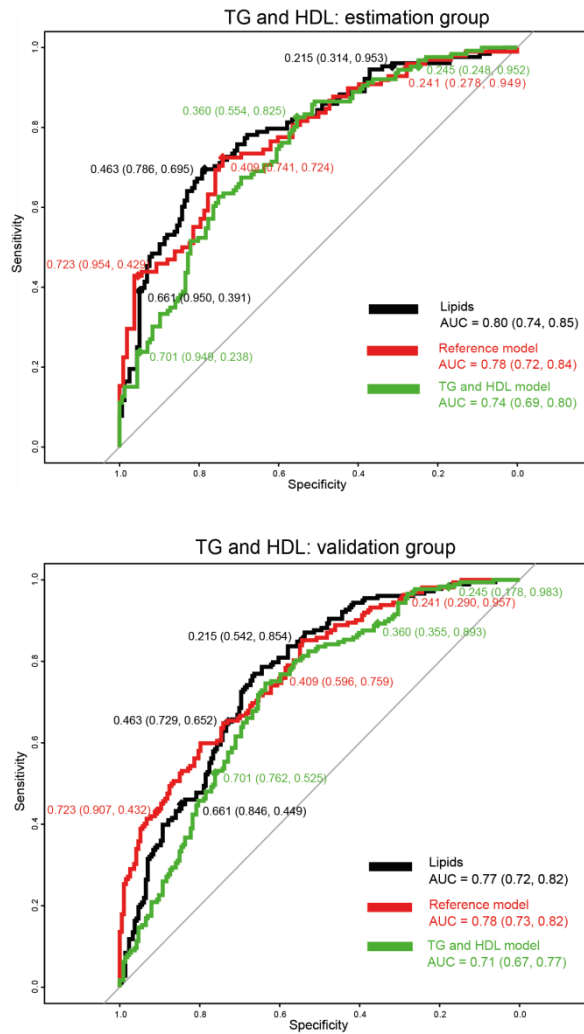

**ESM Fig. 3.** ROC curves of liver fat score derived from HDL cholesterol and triglyceride TG(16:0/18:0/18:1) (green curves).

The diagnostic performance is shown separately for estimation sample, based on which the NAFLD equations were derived, and for the validation sample where the equation was independently tested. Also shown are the ROC curves of the reference model (red curves) [Kotronen A, et al. Gastroenterology 2009;137:865-872] and the liver fat score derived from lipidomics (black curves). Area under ROC curve (AUC) and corresponding 95% confidence intervals are given. Optimal cut-off points corresponding to the maximum sum of sensitivity and specificity, 95% sensitivity (“ruling out”), and 95% specificity (“ruling in”) are marked in the ROC curves, and corresponding numerical values of the cut-off value along with the specificity and sensitivity are provided.
