# Supplementary material for: Prediction of non-alcoholic fatty-liver disease and liver fat content by serum molecular lipids
Source: PubMed Central journal article supplement — Diabetologia. 2013 Jul 4;56(10):2266–74. doi: 10.1007/s00125-013-2981-2 (PMC3764317; doi:10.1007/s00125-013-2981-2), 2013-07-04
Supplement: 125_2013_2981_MOESM7_ESM.pdf [file 125_2013_2981_MOESM7_ESM.pdf]

ESM Fig. 6

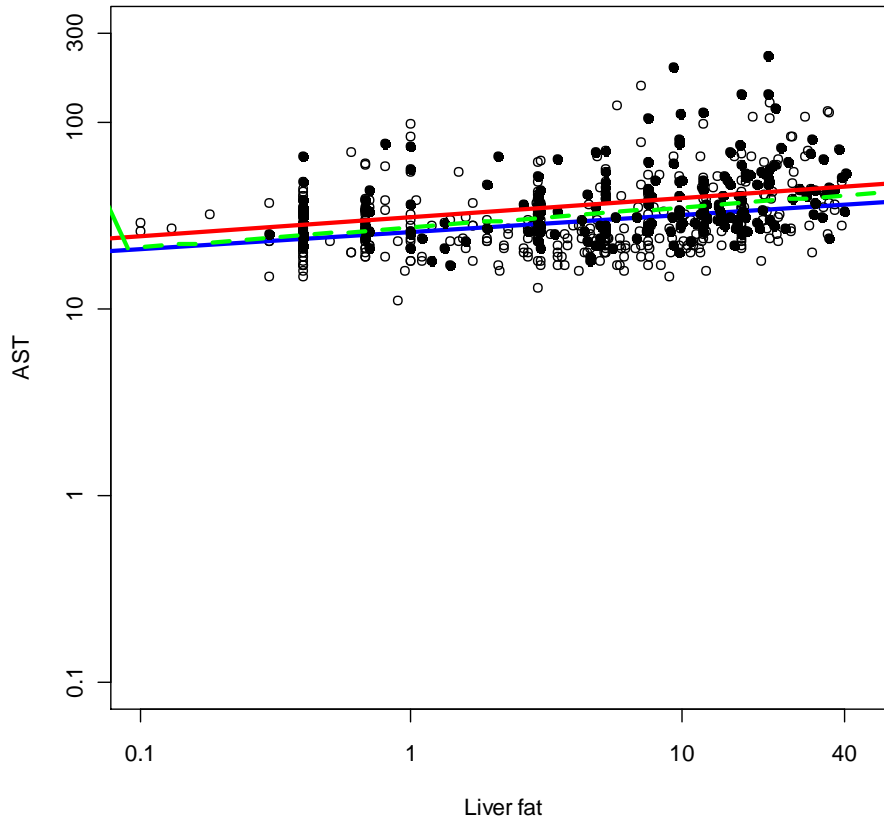

**ESM Fig. 6.** The relationship between measured liver fat and the fasting serum AST from the complete sample series.

The shaded circles denote the male subjects and the white circles denote the female subjects. The Pearson correlation coefficient of the association is  $r=0.353$  ( $p<0.0001$ ). The regression lines shown correspond to male (red), female (blue) and all (green) subjects.
