# Supplementary material for: Prediction of non-alcoholic fatty-liver disease and liver fat content by serum molecular lipids
Source: PubMed Central journal article supplement — Diabetologia. 2013 Jul 4;56(10):2266–74. doi: 10.1007/s00125-013-2981-2 (PMC3764317; doi:10.1007/s00125-013-2981-2), 2013-07-04
Supplement: 125_2013_2981_MOESM12_ESM.pdf [file 125_2013_2981_MOESM12_ESM.pdf]

ESM Table 3

**ESM Table 3.** Clinical characteristics of the subjects from the rimonabant intervention study.

Every measurement is presented as mean  $\pm$  SEM (standard error of mean). Statistic: pairwise t-test (0 weeks vs. 48 weeks) within each group.

| Drug                       | Placebo                          |                                  |         | Rimonabant                       |                                  |         |
|----------------------------|----------------------------------|----------------------------------|---------|----------------------------------|----------------------------------|---------|
|                            | Before intervention<br>(0 weeks) | After intervention<br>(48 weeks) | p-value | Before intervention<br>(0 weeks) | After intervention<br>(48 weeks) | p-value |
| N (female)                 | 8 (8)                            |                                  |         | 12 (10)                          |                                  |         |
| Age (years)                | 53.75 $\pm$ 3.38                 |                                  |         | 51.50 $\pm$ 2.95                 |                                  |         |
| Weight (kg)                | 81.39 $\pm$ 3.55                 | 80.6 $\pm$ 4.61                  | 0.7     | 99.93 $\pm$ 3.81                 | 89.42 $\pm$ 3.12                 | 0.00006 |
| BMI (kg/m <sup>2</sup> )   | 31.36 $\pm$ 1.53                 | 31.01 $\pm$ 1.9                  | 0.67    | 33.76 $\pm$ 0.76                 | 30.25 $\pm$ 0.72                 | 0.00003 |
| Waist (cm)                 | 101.25 $\pm$ 2.15                | 96 $\pm$ 2.72                    | 0.01    | 111.82 $\pm$ 2.69                | 101.98 $\pm$ 1.95                | 0.00023 |
| S-ALT (U/l)                | 36.25 $\pm$ 12.4                 | 27.75 $\pm$ 7.21                 | 0.38    | 26.25 $\pm$ 4.91                 | 17.75 $\pm$ 1.56                 | 0.05    |
| S-AST (U/l)                | 33.63 $\pm$ 11.16                | 25 $\pm$ 3.76                    | 0.29    | 23.42 $\pm$ 1.5                  | 21.08 $\pm$ 1.14                 | 0.17    |
| fP-glucose<br>(mmol/l)     | 5.53 $\pm$ 0.24                  | 5.51 $\pm$ 0.19                  | 0.94    | 5.51 $\pm$ 0.17                  | 5.03 $\pm$ 0.45                  | 0.34    |
| fS-insulin<br>(mU/l)       | 9.86 $\pm$ 1.86                  | 10.60 $\pm$ 2.32                 | 0.62    | 12.07 $\pm$ 1.71                 | 7.27 $\pm$ 0.99                  | 0.0013  |
| Liver fat (%)              | 8.07 $\pm$ 2.51                  | 7.1 $\pm$ 2.6                    | 0.61    | 7.89 $\pm$ 2.12                  | 1.32 $\pm$ 0.24                  | 0.0089  |
| Predicted liver<br>fat (%) | 3.42 $\pm$ 0.69                  | 5.02 $\pm$ 1.07                  | 0.31    | 4.69 $\pm$ 0.71                  | 3.1 $\pm$ 0.45                   | 0.043   |
